# Supplementary material for: Quantitative Analysis of Signal Heterogeneity in the Hepatobiliary Phase of Pretreatment Gadoxetic Acid-Enhanced MRI as a Prognostic Imaging Biomarker in Transarterial Chemoembolization for Intermediate-Stage Hepatocellular Carcinoma
Source: MDPI journal article supplement (doi:10.3390/cancers15041238), 2023-02-15

Table S1. Univariate analysis of risk factors associated with OS up to 2 years after treatment among patients with intermediate-stage HCC.

|                                 | Univariate analysis |                          |
|---------------------------------|---------------------|--------------------------|
|                                 | P-value             | HR (95% CI)              |
| Age $\geq$ 80 years             | 0.2635              | 2.351 (0.5254–10.52)     |
| Etiology of liver disease       | 0.9954              | 1.006 (0.1315–7.696)     |
| Coefficient of variation        | 0.1543              | 1973 (0.05767–67530000)  |
| AFP $\geq$ 200 ng/mL            | 0.1156              | 2.543 (0.7952–8.131)     |
| Up-to-7 out                     | 0.005301            | 5.227 (1.634–16.71)      |
| Up-to-11 out                    | 0.05858             | 3.445 (0.9561–12.41)     |
| Child–Pugh score 7              | 0.1567              | 2.96 (0.6592–13.3)       |
| ALBI grade 2                    | 0.1045              | 3.456 (0.7733–15.45)     |
| PT <70%                         | 0.02848             | 5.423 (1.195–24.61)      |
| Totalbilirubin $\geq$ 2.0 mg/dL | 0.9978              | 0.0000001091 (0.000–Inf) |
| Albumin <3.5 g/dL               | 0.07879             | 2.667 (0.8933–7.964)     |
| Post-TACE MTA                   | 0.5238              | 0.6144 (0.1375–2.746)    |
| SEX                             | 0.2585              | 2.371 (0.5304–10.59)     |

Figure S1. Kaplan–Meier analysis of OS in the group scanned by 1.5T between two groups divided based on each explanatory variable.

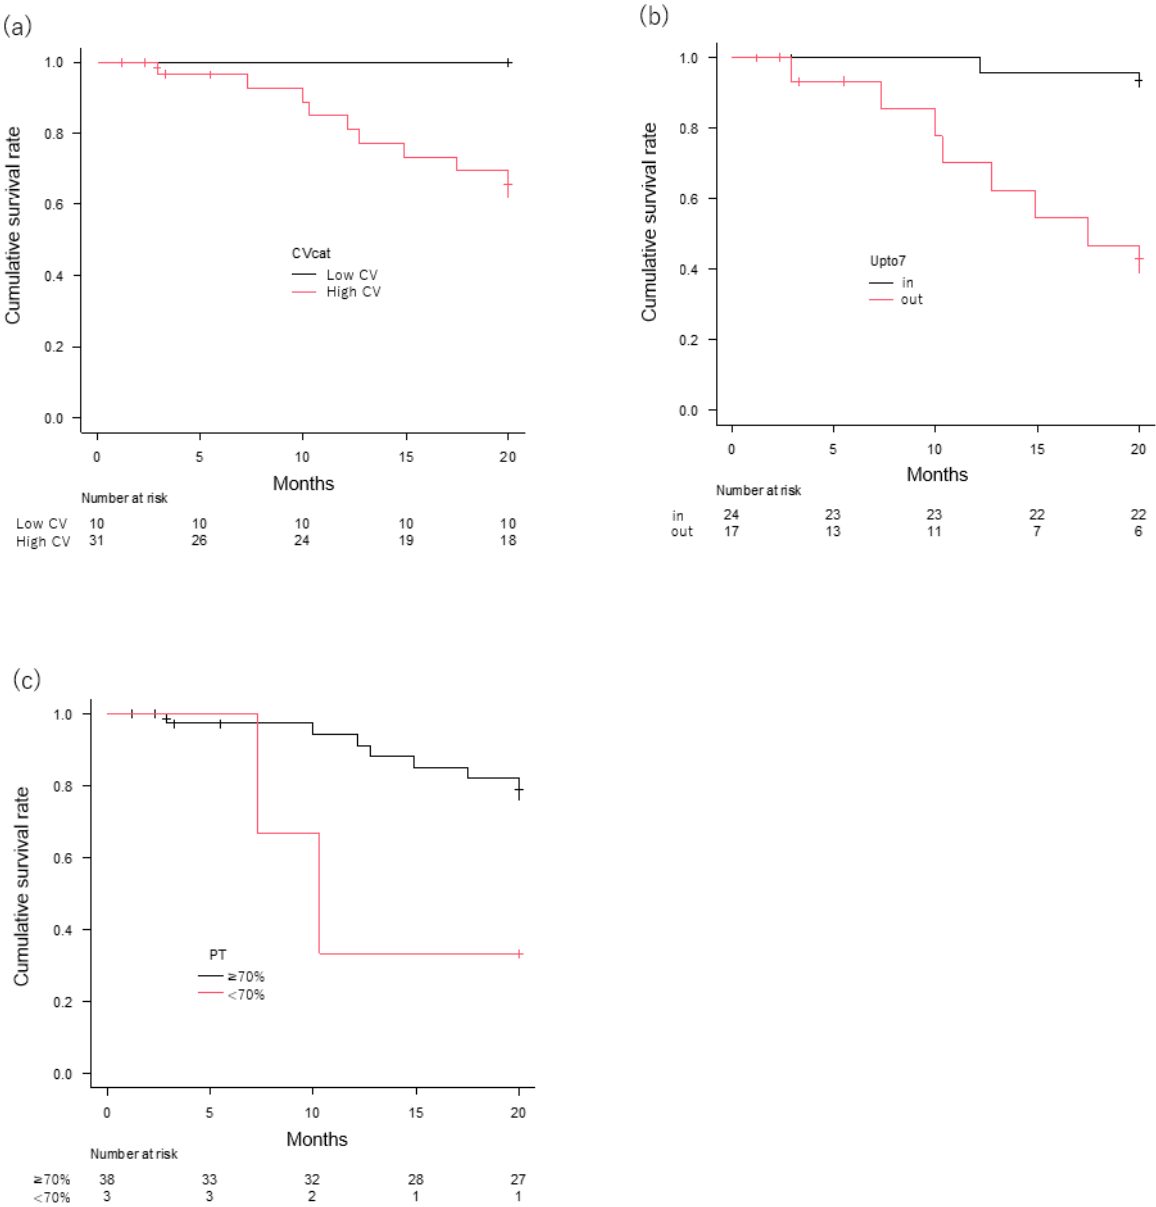

Figure S2. Kaplan–Meier analysis of OS in the group scanned by 3.0T between two groups divided based on each explanatory variable.

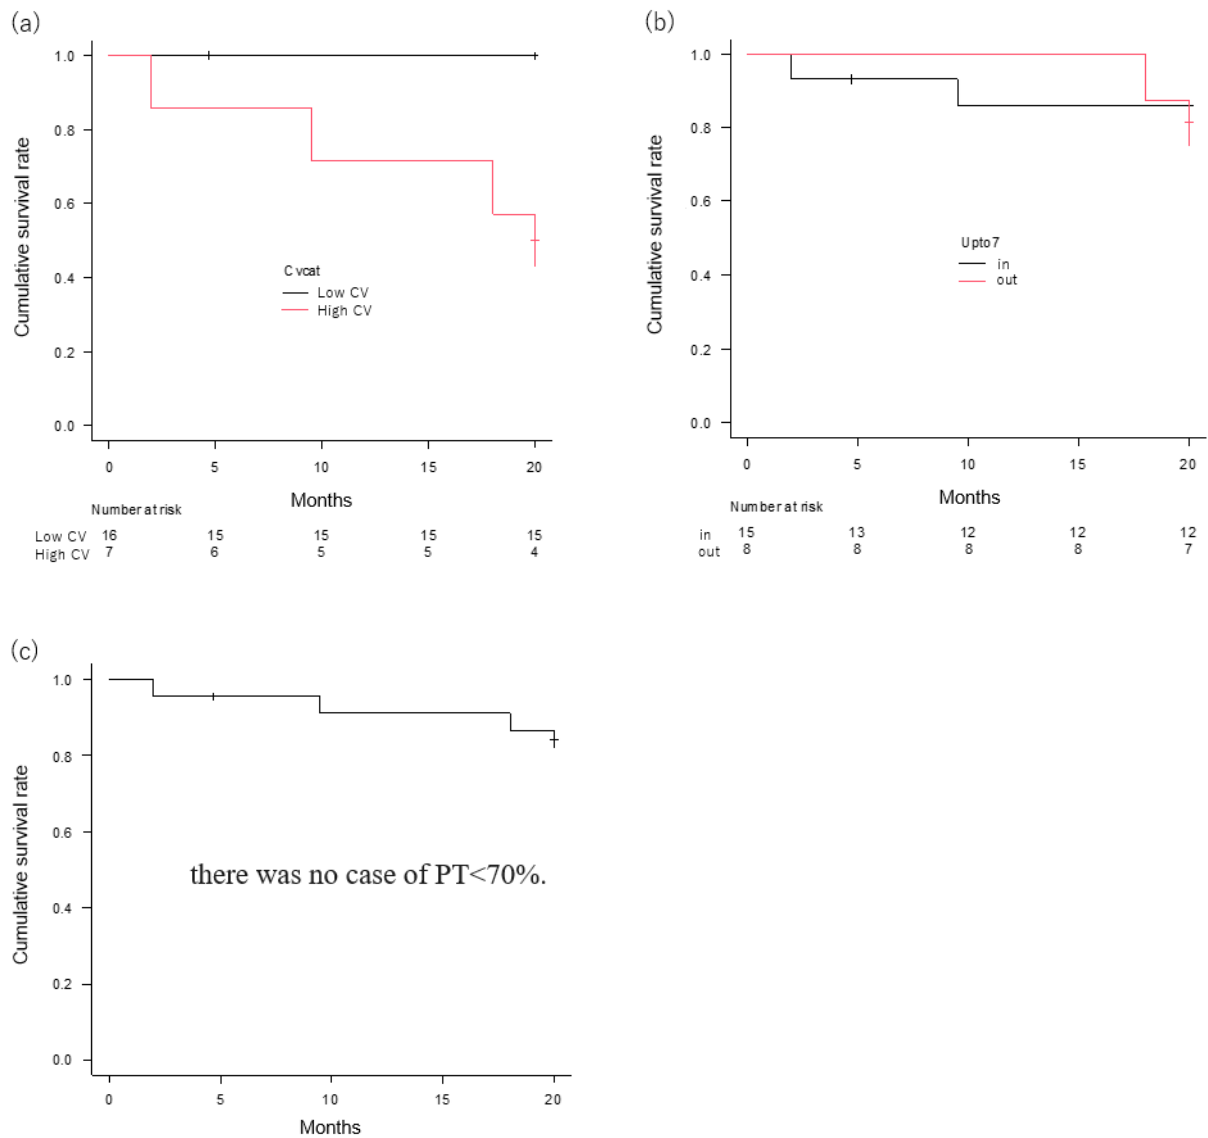

Supplement: s1 [file s1]
